# Supplementary material
Source: PubMed Central journal article supplement (PMC6728674)
Supplement: DS_10.1177_0022034516680555.pdf [file DS_10.1177_0022034516680555.pdf]

## The NIH's Funding to US Dental Institutions from 2005 to 2014

C.L. Ferland, M. O'Hayre, W.M. Knosp, C.H. Fox, and D.J. Horsford

### Appendix

Appendix Table 1. A detailed summary of the total project numbers for NIH and for NIDCR included in the dataset.

| <i><b>For All NIH</b></i>                                                 | <b># Projects</b> |
|---------------------------------------------------------------------------|-------------------|
| RePORTer search for ALL "Schools of Dentistry" 2005-2014                  | 9430              |
| RePORTer search ONLY Univ. of Rochester non DOCD 2005-2014                | -3789             |
| RePORTer search ONLY Univ. of Rochester DOCD Spending Category 2008-2014* | +126              |
| RePORTer search ONLY Forsyth Institute 2005-2014                          | +237              |
| <b><i>Subtotal of NIH Projects</i></b>                                    | <b>6004</b>       |
| Additional Projects Removed                                               | -14               |
| <b>Final Total NIH</b>                                                    | <b>5990</b>       |
| <hr/>                                                                     |                   |
| <i><b>For NIDCR Only</b></i>                                              |                   |
| RePORTer search ALL NIDCR "Schools of Dentistry" 2005-2014                | 4044              |
| RePORTer search ONLY Univ. of Rochester non DOCD 2005-2014                | -185              |
| RePORTer search ONLY Univ. of Rochester DOCD Spending Category 2008-2014* | +122              |
| RePORTer search ONLY Forsyth Institute 2005-2014                          | +194              |
| <b>Total Number of NIDCR Projects</b>                                     | <b>4175</b>       |

All award data were obtained by performing a full search of NIH funding to US dental institutions from 2005 to 2014 excluding projects funded by the American Recovery and Reinvestment Act (ARRA) of 2009 and 2010 and subprojects. Since RePORT data for the University of Rochester includes all awards to the School of Medicine and Dentistry, the NIH Research, Condition, and Disease Categorization spending category 'Dental/Oral and Craniofacial Disease' (DOCD) was used as a proxy to identify dental-related research awards to the University of Rochester. This dataset is only available for 2008-2014, therefore in all analyses, the awards to Rochester do not include 2005-2007 (\*). We also considered the Forsyth Institute a dental institution, and added 2005-2014 Forsyth awards to the final dataset. Awards from three institutions that no longer have a school of dentistry were removed from the NIH data set (Northwestern University n=11 projects; Georgetown University n=2 projects; Loyola University in Chicago n=1 project).

Appendix Table 2. Total 10-year (FY 2005-2014) NIH and NIDCR dollars awarded to dental institutions.

2005-2014

| Organization                                                                    | NIH Rank | NIH Total                      |                             | NIH RPG             | NIH Training        | NIDCR Total                    |            | % Total Extramural       |                          | NIDCR R01           | % Total NIH       | NIDCR RPG           | % Total NIH       | NIDCR Training      | % Total NIH         |
|---------------------------------------------------------------------------------|----------|--------------------------------|-----------------------------|---------------------|---------------------|--------------------------------|------------|--------------------------|--------------------------|---------------------|-------------------|---------------------|-------------------|---------------------|---------------------|
|                                                                                 |          | Extramural Award Dollars (\$M) | NIH R01 Award Dollars (\$M) | Award Dollars (\$M) | Award Dollars (\$M) | Extramural Award Dollars (\$M) | NIDCR Rank | Award Dollars from NIDCR | Award Dollars from NIDCR | Award Dollars (\$M) | R01 \$ from NIDCR | Award Dollars (\$M) | RPG \$ from NIDCR | Award Dollars (\$M) | Award Dollars (\$M) |
| UNIVERSITY OF CALIFORNIA SAN FRANCISCO                                          | 1        | \$166.35                       | \$76.46                     | \$111.86            | \$15.71             | \$98.17                        | 1          | 59.0%                    | \$31.25                  | 40.9%               | \$53.25           | 47.6%               | \$15.07           | 95.9%               |                     |
| UNIVERSITY OF MICHIGAN AT ANN ARBOR                                             | 2        | \$124.43                       | \$84.36                     | \$104.54            | \$12.91             | \$97.39                        | 2          | 78.3%                    | \$64.80                  | 76.8%               | \$81.54           | 78.0%               | \$11.93           | 92.4%               |                     |
| FORSYTH INSTITUTE                                                               | 3        | \$102.74                       | \$58.00                     | \$94.94             | \$4.42              | \$88.54                        | 3          | 86.2%                    | \$49.31                  | 85.0%               | \$84.31           | 88.8%               | \$4.19            | 94.8%               |                     |
| UNIVERSITY OF NORTH CAROLINA CHAPEL HILL                                        | 4        | \$98.32                        | \$32.71                     | \$91.02             | \$7.29              | \$78.13                        | 4          | 79.5%                    | \$25.27                  | 77.3%               | \$71.21           | 78.2%               | \$6.91            | 94.8%               |                     |
| UNIVERSITY OF CALIFORNIA LOS ANGELES                                            | 5        | \$93.07                        | \$51.06                     | \$80.46             | \$10.75             | \$71.78                        | 6          | 77.1%                    | \$36.60                  | 71.7%               | \$60.66           | 75.4%               | \$10.48           | 97.5%               |                     |
| UNIVERSITY OF FLORIDA                                                           | 6        | \$91.30                        | \$60.54                     | \$72.45             | \$11.98             | \$66.08                        | 9          | 72.4%                    | \$43.42                  | 71.7%               | \$50.91           | 70.3%               | \$8.31            | 69.4%               |                     |
| UNIVERSITY OF MARYLAND BALTIMORE                                                | 7        | \$89.19                        | \$58.04                     | \$79.07             | \$7.50              | \$37.23                        | 14         | 41.7%                    | \$27.43                  | 47.3%               | \$30.62           | 38.7%               | \$6.61            | 88.1%               |                     |
| NEW YORK UNIVERSITY                                                             | 8        | \$87.36                        | \$35.88                     | \$77.42             | \$4.35              | \$71.13                        | 7          | 81.4%                    | \$24.07                  | 67.1%               | \$64.45           | 83.2%               | \$4.10            | 94.3%               |                     |
| UNIVERSITY OF ALABAMA AT BIRMINGHAM                                             | 9        | \$83.04                        | \$21.37                     | \$74.17             | \$6.84              | \$74.22                        | 5          | 89.4%                    | \$15.09                  | 70.6%               | \$65.35           | 88.1%               | \$6.84            | 100.0%              |                     |
| UNIVERSITY OF PENNSYLVANIA                                                      | 10       | \$81.93                        | \$60.39                     | \$75.83             | \$4.52              | \$31.76                        | 18         | 38.8%                    | \$28.66                  | 47.5%               | \$30.55           | 40.3%               | \$1.21            | 26.8%               |                     |
| BOSTON UNIVERSITY MEDICAL CAMPUS                                                | 11       | \$79.71                        | \$54.77                     | \$60.54             | \$2.81              | \$51.95                        | 10         | 65.2%                    | \$29.63                  | 54.1%               | \$33.12           | 54.7%               | \$2.61            | 92.9%               |                     |
| UNIVERSITY OF SOUTHERN CALIFORNIA                                               | 12       | \$75.40                        | \$46.02                     | \$70.13             | \$5.10              | \$45.34                        | 11         | 60.1%                    | \$2.83                   | 6.1%                | \$41.66           | 59.4%               | \$3.54            | 69.4%               |                     |
| UNIVERSITY OF WASHINGTON                                                        | 13       | \$72.78                        | \$25.88                     | \$49.54             | \$10.87             | \$67.35                        | 8          | 92.5%                    | \$22.14                  | 85.5%               | \$44.75           | 90.3%               | \$10.87           | 100.0%              |                     |
| HARVARD UNIVERSITY                                                              | 14       | \$66.98                        | \$46.84                     | \$62.18             | \$4.21              | \$11.52                        | 33         | 17.2%                    | \$5.01                   | 10.7%               | \$7.46            | 12.0%               | \$4.06            | 96.4%               |                     |
| UNIVERSITY OF MINNESOTA TWIN CITIES                                             | 15       | \$55.55                        | \$31.51                     | \$44.91             | \$10.64             | \$35.08                        | 15         | 63.1%                    | \$14.84                  | 47.1%               | \$25.72           | 57.3%               | \$9.36            | 88.0%               |                     |
| UNIVERSITY OF CONNECTICUT SCH OF MED/DNT                                        | 16       | \$53.15                        | \$36.29                     | \$42.79             | \$8.31              | \$31.31                        | 19         | 58.9%                    | \$17.01                  | 46.9%               | \$20.97           | 49.0%               | \$8.31            | 100.0%              |                     |
| UNIVERSITY OF LOUISVILLE                                                        | 17       | \$48.20                        | \$27.31                     | \$34.61             | \$1.84              | \$32.90                        | 17         | 68.3%                    | \$25.84                  | 94.6%               | \$31.15           | 90.0%               | \$1.74            | 94.6%               |                     |
| UNIVERSITY OF ROCHESTER*                                                        | 18       | \$46.91                        | \$37.11                     | \$39.95             | \$6.55              | \$44.59                        | 12         | 95.1%                    | \$35.63                  | 96.0%               | \$38.05           | 95.2%               | \$6.51            | 99.4%               |                     |
| UNIVERSITY OF ILLINOIS AT CHICAGO                                               | 19       | \$46.12                        | \$26.64                     | \$34.80             | \$5.78              | \$27.77                        | 21         | 60.2%                    | \$18.23                  | 68.4%               | \$20.20           | 58.0%               | \$5.78            | 100.0%              |                     |
| UNIVERSITY OF PITTSBURGH AT PITTSBURGH                                          | 20       | \$43.83                        | \$32.20                     | \$40.68             | \$2.81              | \$42.08                        | 13         | 96.0%                    | \$31.55                  | 98.0%               | \$39.64           | 97.4%               | \$2.43            | 86.5%               |                     |
| UNIVERSITY OF TEXAS HLTH SCI CENTER SAN ANTONIO                                 | 21       | \$39.77                        | \$21.96                     | \$31.37             | \$7.75              | \$25.95                        | 24         | 65.2%                    | \$11.39                  | 51.9%               | \$17.70           | 56.4%               | \$7.60            | 98.1%               |                     |
| OHIO STATE UNIVERSITY                                                           | 22       | \$37.32                        | \$24.92                     | \$30.23             | \$7.09              | \$18.08                        | 26         | 48.4%                    | \$7.95                   | 31.9%               | \$11.03           | 36.5%               | \$7.05            | 99.4%               |                     |
| UNIVERSITY OF MISSOURI KANSAS CITY                                              | 23       | \$35.54                        | \$14.82                     | \$29.46             | \$5.16              | \$16.35                        | 29         | 46.0%                    | \$8.97                   | 60.5%               | \$11.12           | 37.7%               | \$5.12            | 99.2%               |                     |
| UNIVERSITY OF IOWA                                                              | 24       | \$33.61                        | \$25.69                     | \$28.82             | \$4.79              | \$33.61                        | 16         | 100.0%                   | \$25.69                  | 100.0%              | \$28.82           | 100.0%              | \$4.79            | 100.0%              |                     |
| MEDICAL UNIVERSITY OF SOUTH CAROLINA                                            | 25       | \$31.43                        | \$4.44                      | \$8.05              | \$4.30              | \$12.50                        | 32         | 39.8%                    | \$4.03                   | 90.8%               | \$6.65            | 82.6%               | \$4.18            | 97.2%               |                     |
| STATE UNIVERSITY OF NEW YORK AT BUFFALO                                         | 26       | \$30.58                        | \$22.95                     | \$27.17             | \$3.41              | \$26.24                        | 22         | 85.8%                    | \$20.12                  | 87.7%               | \$23.14           | 85.2%               | \$3.10            | 90.9%               |                     |
| CASE WESTERN RESERVE UNIVERSITY                                                 | 27       | \$29.63                        | \$13.31                     | \$27.01             | \$2.61              | \$29.63                        | 20         | 100.0%                   | \$13.31                  | 100.0%              | \$27.01           | 100.0%              | \$2.61            | 100.0%              |                     |
| UNIVERSITY OF COLORADO DENVER                                                   | 28       | \$29.31                        | \$22.30                     | \$26.85             | \$0.92              | \$25.97                        | 23         | 88.6%                    | \$19.05                  | 85.4%               | \$23.58           | 87.8%               | \$0.86            | 93.5%               |                     |
| UNIVERSITY OF NEBRASKA MEDICAL CENTER                                           | 29       | \$26.99                        | \$8.39                      | \$9.29              | \$0.00              | \$5.27                         | 41         | 19.5%                    | \$5.27                   | 62.8%               | \$5.27            | 56.7%               | \$0.00            | n/a                 |                     |
| UNIVERSITY OF KENTUCKY                                                          | 30       | \$24.66                        | \$2.07                      | \$3.81              | \$0.81              | \$4.38                         | 42         | 17.8%                    | \$2.07                   | 100.0%              | \$3.57            | 93.7%               | \$0.81            | 100.0%              |                     |
| TEXAS A&M UNIVERSITY HEALTH SCIENCE CTR                                         | 31       | \$20.72                        | \$13.49                     | \$15.85             | \$2.28              | \$19.35                        | 25         | 93.4%                    | \$13.02                  | 96.5%               | \$15.02           | 94.8%               | \$2.28            | 100.0%              |                     |
| COLUMBIA UNIVERSITY HEALTH SCIENCES                                             | 32       | \$20.47                        | \$16.12                     | \$18.99             | \$1.46              | \$12.95                        | 30         | 63.2%                    | \$8.85                   | 54.9%               | \$11.48           | 60.5%               | \$1.46            | 100.0%              |                     |
| RBHS-SCHOOL OF DENTAL MEDICINE (Former UNIV OF MED/DENT OF NJ-NJ DENTAL SCHOOL) | 33       | \$18.93                        | \$16.43                     | \$18.68             | \$0.25              | \$16.92                        | 27         | 89.4%                    | \$15.21                  | 92.6%               | \$16.67           | 89.2%               | \$0.25            | 100.0%              |                     |
| STATE UNIVERSITY NEW YORK STONY BROOK                                           | 34       | \$18.88                        | \$4.99                      | \$18.11             | \$0.77              | \$16.66                        | 28         | 88.2%                    | \$3.98                   | 79.8%               | \$15.89           | 87.7%               | \$0.77            | 100.0%              |                     |
| TUFTS UNIVERSITY BOSTON                                                         | 35       | \$18.24                        | \$15.52                     | \$18.24             | \$0.00              | \$12.78                        | 31         | 70.1%                    | \$10.48                  | 67.5%               | \$12.78           | 70.1%               | \$0.00            | n/a                 |                     |
| UNIVERSITY OF TEXAS HLTH SCI CTR HOUSTON                                        | 36       | \$14.99                        | \$10.27                     | \$12.36             | \$2.23              | \$8.77                         | 35         | 58.5%                    | \$4.62                   | 45.0%               | \$6.54            | 52.9%               | \$2.23            | 100.0%              |                     |
| OREGON HEALTH & SCIENCE UNIVERSITY                                              | 37       | \$14.29                        | \$9.90                      | \$13.35             | \$0.05              | \$5.38                         | 40         | 37.6%                    | \$2.47                   | 24.9%               | \$4.74            | 35.5%               | \$0.05            | 100.0%              |                     |
| VIRGINIA COMMONWEALTH UNIVERSITY                                                | 38       | \$11.98                        | \$9.19                      | \$10.27             | \$1.71              | \$9.85                         | 34         | 82.3%                    | \$8.17                   | 88.9%               | \$8.63            | 84.0%               | \$1.22            | 71.3%               |                     |
| LSU HEALTH SCIENCES CENTER                                                      | 39       | \$9.16                         | \$7.10                      | \$8.72              | \$0.00              | \$6.56                         | 38         | 71.6%                    | \$5.24                   | 73.8%               | \$6.56            | 75.2%               | \$0.00            | n/a                 |                     |
| GEORGIA HEALTH SCIENCES UNIVERSITY/GEORGIA REGENTS                              | 40       | \$8.90                         | \$6.58                      | \$8.22              | \$0.68              | \$7.85                         | 36         | 88.2%                    | \$5.93                   | 90.1%               | \$7.17            | 87.2%               | \$0.68            | 100.0%              |                     |
| INDIANA UNIV-PURDUE UNIV AT INDIANAPOLIS                                        | 41       | \$7.75                         | \$4.80                      | \$7.43              | \$0.29              | \$7.28                         | 37         | 94.0%                    | \$4.55                   | 94.8%               | \$6.96            | 93.7%               | \$0.29            | 100.0%              |                     |
| UNIVERSITY OF PUERTO RICO MED SCIENCES                                          | 42       | \$6.08                         | \$4.90                      | \$5.31              | \$0.66              | \$6.08                         | 39         | 100.0%                   | \$4.90                   | 100.0%              | \$5.31            | 100.0%              | \$0.66            | 100.0%              |                     |
| UNIVERSITY OF OKLAHOMA HLTH SCIENCES CTR                                        | 43       | \$3.43                         | \$2.07                      | \$3.43              | \$0.00              | \$3.43                         | 43         | 100.0%                   | \$2.07                   | 100.0%              | \$3.43            | 100.0%              | \$0.00            | n/a                 |                     |
| NOVA SOUTHEASTERN UNIVERSITY                                                    | 44       | \$3.30                         | \$2.77                      | \$3.30              | \$0.00              | \$3.30                         | 44         | 100.0%                   | \$2.77                   | 100.0%              | \$3.30            | 100.0%              | \$0.00            | n/a                 |                     |
| UNIVERSITY OF MISSISSIPPI MEDICAL CENTER                                        | 45       | \$2.50                         | \$2.38                      | \$2.50              | \$0.00              | \$2.50                         | 45         | 100.0%                   | \$2.38                   | 100.0%              | \$2.50            | 100.0%              | \$0.00            | n/a                 |                     |
| UNIVERSITY OF TENNESSEE HEALTH SCI CTR                                          | 46       | \$2.15                         | \$1.93                      | \$2.06              | \$0.00              | \$0.97                         | 50         | 44.9%                    | \$0.75                   | 38.9%               | \$0.89            | 43.2%               | \$0.00            | n/a                 |                     |
| HOWARD UNIVERSITY                                                               | 47       | \$2.06                         | \$0.81                      | \$1.09              | \$0.00              | \$1.09                         | 48         | 52.7%                    | \$0.81                   | 100.0%              | \$1.09            | 100.0%              | \$0.00            | n/a                 |                     |
| TEMPLE UNIV OF THE COMMONWEALTH                                                 | 48       | \$1.91                         | \$1.50                      | \$1.91              | \$0.00              | \$0.42                         | 51         | 21.7%                    | \$0.00                   | 0.0%                | \$0.42            | 22.0%               | \$0.00            | n/a                 |                     |
| MARQUETTE UNIVERSITY                                                            | 49       | \$1.81                         | \$0.55                      | \$1.49              | \$0.00              | \$1.81                         | 46         | 100.0%                   | \$0.55                   | 100.0%              | \$1.49            | 100.0%              | \$0.00            | n/a                 |                     |
| MEHARRY MEDICAL COLLEGE                                                         | 50       | \$1.51                         | \$0.68                      | \$1.51              | \$0.00              | \$1.51                         | 47         | 100.0%                   | \$0.68                   | 100.0%              | \$1.51            | 100.0%              | \$0.00            | n/a                 |                     |
| CREIGHTON UNIVERSITY                                                            | 51       | \$1.41                         | \$0.69                      | \$1.33              | \$0.08              | \$0.98                         | 49         | 69.8%                    | \$0.69                   | 100.0%              | \$0.91            | 68.4%               | \$0.08            | 100.0%              |                     |
| LOMA LINDA UNIVERSITY                                                           | 52       | \$0.66                         | \$0.00                      | \$0.66              | \$0.00              | \$0.24                         | 54         | 36.3%                    | \$0.00                   | n/a                 | \$0.24            | 36.4%               | \$0.00            | n/a                 |                     |
| UNIVERSITY OF NEVADA LAS VEGAS                                                  | 53       | \$0.36                         | \$0.00                      | \$0.36              | \$0.00              | \$0.36                         | 52         | 100.0%                   | \$0.00                   | n/a                 | \$0.36            | 100.0%              | \$0.00            | n/a                 |                     |
| UNIVERSITY OF UTAH                                                              | 54       | \$0.34                         | \$0.34                      | \$0.34              | \$0.00              | \$0.34                         | 53         | 100.0%                   | \$0.34                   | 100.0%              | \$0.34            | 100.0%              | \$0.00            | n/a                 |                     |
| UNIVERSITY OF THE PACIFIC-STOCKTON                                              | 55       | \$0.29                         | \$0.00                      | \$0.29              | \$0.00              | \$0.18                         | 55         | 62.9%                    | \$0.00                   | n/a                 | \$0.18            | 62.1%               | \$0.00            | n/a                 |                     |
| WEST VIRGINIA UNIVERSITY                                                        | 56       | \$0.07                         | \$0.00                      | \$0.07              | \$0.00              | \$0.00 n/a                     |            | 0.0%                     | \$0.00                   | n/a                 | \$0.00            | 0.0%                | \$0.00            | n/a                 |                     |
| <b>Totals</b>                                                                   |          | <b>\$2,117.41</b>              | <b>\$1,197.24</b>           | <b>\$1,739.82</b>   | <b>\$192.49</b>     | <b>\$1,449.86</b>              |            | <b>68.47%</b>            | <b>\$764.92</b>          |                     | <b>\$1,187.87</b> |                     | <b>\$176.95</b>   |                     |                     |
| <b>Average Percentage from NIDCR</b>                                            |          |                                |                             |                     |                     |                                |            |                          |                          |                     |                   |                     |                   |                     |                     |

All 56 of the dental institutions in the dataset are listed, including the percent of total NIH extramural award dollars and total extramural award dollars (\$) awarded by NIDCR to each institution, the percentage and total NIH extramural award dollars for selected grant mechanisms awarded by NIDCR, and the overall NIH and NIDCR institutional rankings. Data from the University of Rochester is limited to FY 2008-2014, NIH Dental/Oral and Craniofacial spending category only (\*).



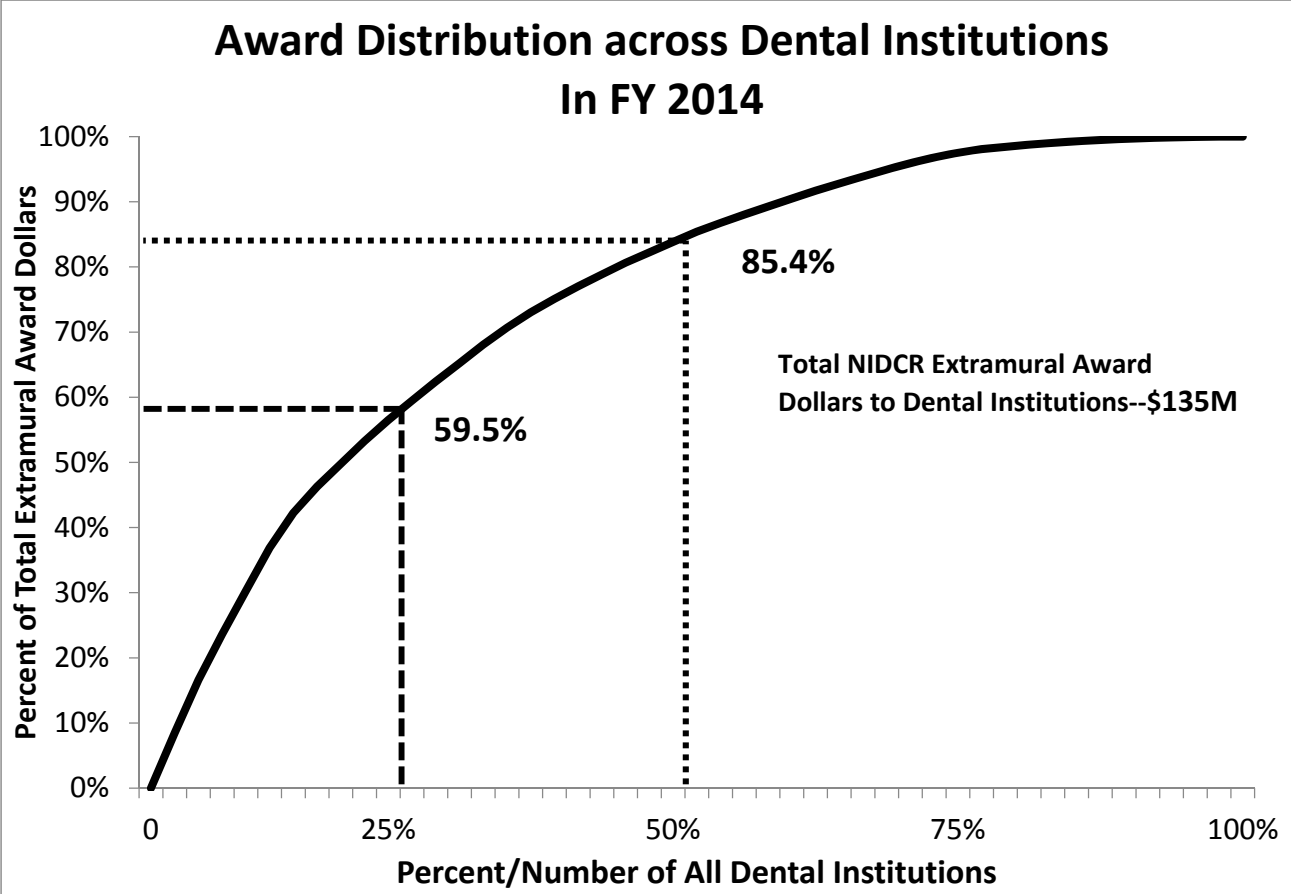

Appendix Figure 1. NIDCR funding distribution across dental institutions. NIDCR funding to dental institutions is broken down by the percentile of total extramural award dollars for FY 2014. A total of 46 institutions received funding from NIDCR in 2014. The dashed line shows the top 25% of those institutions (based on rank for total extramural award dollars from NIDCR) received 59% of the total \$135 million awarded in 2014. The dotted line shows the top 50% of those institutions received 85.4% of the total \$135 million awarded in 2014.

## NIH Awards to Dental Institutions

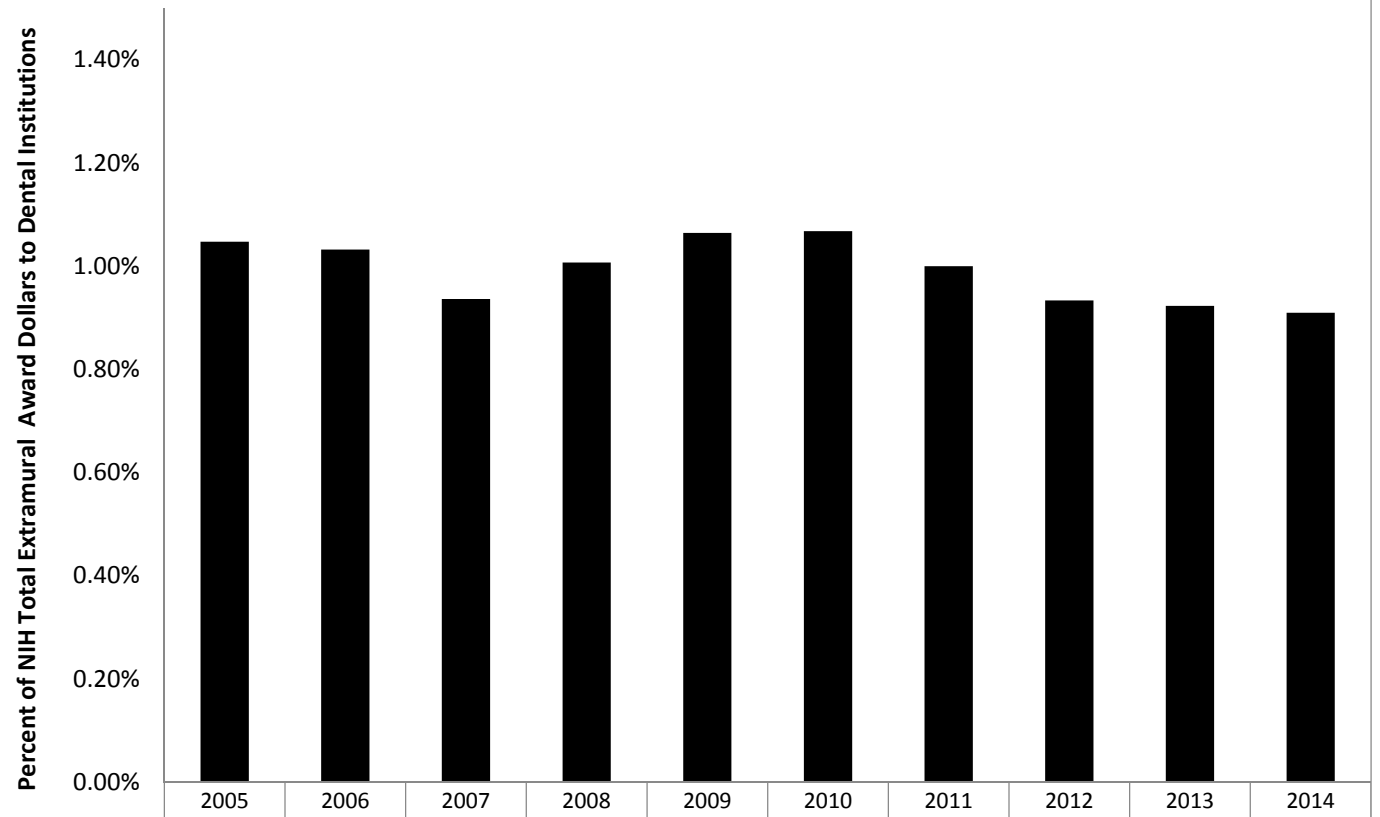

|                                                                 |             |             |             |             |             |             |             |             |             |             |
|-----------------------------------------------------------------|-------------|-------------|-------------|-------------|-------------|-------------|-------------|-------------|-------------|-------------|
| Percent of NIH Total Extramural Award Dollars                   | 1.05%       | 1.03%       | 0.94%       | 1.01%       | 1.06%       | 1.07%       | 1.00%       | 0.93%       | 0.92%       | 0.91%       |
| Total NIH Extramural Award Dollars (\$M)                        | \$20,606.27 | \$20,442.57 | \$21,136.68 | \$21,148.33 | \$21,674.84 | \$22,119.86 | \$22,022.85 | \$22,160.93 | \$20,671.22 | \$21,476.83 |
| Total NIH Extramural Award Dollars to Dental Institutions (\$M) | \$215.77    | \$210.94    | \$197.86    | \$212.92    | \$230.67    | \$236.18    | \$220.14    | \$206.85    | \$190.74    | \$195.35    |

Appendix Figure 2. Percent of NIH’s total extramural research and training award dollars (total award dollars) awarded to US dental institutions (black bars).
